# Supplementary material for: Assessment of the combined radiative effects of black carbon in the atmosphere and snowpack in the Northern Hemisphere constrained by surface observations
Source: Royal Society of Chemistry journal article supplement (doi:10.1039/d2ea00005a), 2022-01-01
Supplement: d2ea00005a1.pdf [file d2ea00005a1.pdf]

Supporting Information for

**Assessment of the combined radiative effects of black carbon in the  
atmosphere and snowpack in the Northern Hemisphere constrained by  
surface observations**

**Tenglong Shi<sup>a</sup>, Yang Chen<sup>a</sup>, Yuxuan Xing<sup>a</sup>, Xiaoying Niu<sup>a</sup>, Dongyou Wu<sup>a</sup>, Jiecan  
Cui<sup>a</sup>, Yue Zhou<sup>a</sup>, Wei Pu<sup>a</sup>, and Xin Wang<sup>\*ab</sup>**

<sup>\*</sup>Corresponding author

<sup>a</sup>Key Laboratory for Semi-Arid Climate Change of the Ministry of Education, College of  
Atmospheric Sciences, Lanzhou University, Lanzhou 730000, China. E-mail:  
[wxin@lzu.edu.cn](mailto:wxin@lzu.edu.cn)

<sup>b</sup>School of Earth System Science, Tianjin University, Tianjin 300072, China

**Contents of this file**

Text S1

Figures S1 to S6

Table S1

## 1 S1 - Inputs for atmospheric and snow radiative transfer model

2 Input parameters for the Fu–Liou radiative transfer model (RTM) typically include the  
3 meteorological variables temperature, pressure, humidity, and ozone concentration as well  
4 as aerosol profiles and aerosol optical depth at the wavelength of 0.55  $\mu\text{m}$ . Additional  
5 required input includes cloud property profiles (i.e., liquid water content, ice water content,  
6 effective radius of water cloud, and effective diameter of ice cloud) and surface albedo.

7 We obtained monthly pressure-level meteorological variables (temperature, pressure,  
8 humidity, ozone concentration) from the Modern-Era Retrospective Analysis for Research  
9 and Applications, Version 2 (MERRA-2) datasets (product: instM\_3d\_asm\_Np). The  
10 horizontal resolution of the dataset is  $0.5^\circ \times 0.625^\circ$ ; vertical resolution comprises 42 levels  
11 spread between the surface and an altitude of 80 km. MERRA-2 is a new reanalysis data  
12 released in 2017 by NASA's Global Modeling and Assimilation Office (GMAO).<sup>1</sup> It's  
13 based on the Goddard Earth Observing System Model, Version 5 (GEOS-5) and Data  
14 Assimilation System, Version 5.12.4 (ADAS-5.12.4).<sup>2</sup> The MERRA-2 data is available  
15 online through the Goddard Earth Sciences (GES) Data and Information Services Center  
16 (DISC) (<https://disc.gsfc.nasa.gov>).

17 The BC profile and optical depth at 0.55  $\mu\text{m}$  used in this study were also derived from the  
18 MEAAR-2 datasets (product: inst3\_3d\_aer\_Nv and tavgM\_2d\_aer\_Nx). Here we average  
19 the 3-hourly BC mixing ratio data on a monthly scale, and interpolate the initial 72 pressure  
20 layers in the vertical direction to 42 pressure layers, corresponding to the vertical layers of  
21 the meteorological variables. In addition, several AOD datasets are assimilated and  
22 absorbed by MERRA-2, including bias-corrected AOD of the Moderate Resolution  
23 Imaging Spectrometer (MODIS), the Advanced Very High Resolution Radiometer  
24 (AVHRR) instruments, AOD retrievals from the Multiangle Imaging SpectroRadiometer  
25 (MISR) over bright surfaces, and ground-based Aerosol Robotic Network (AERONET)  
26 direct measurements of AOD.<sup>1, 3</sup> Therefore, the MERRA-2 AOD datasets are relatively  
27 reliable.<sup>4</sup>

28 The cloud microphysical parameters, including liquid water content (LWC), ice water  
29 content (IWC), effective radius of water cloud particles, and effective diameter of ice cloud  
30 particles, were obtained from the monthly CERES SYN1deg Ed4A product (hereinafter  
31 CERES, the Clouds and the Earth's Radiant Energy System).<sup>5</sup> Which are derived by

1 combining cloud properties measured by the MODIS sensor on board the Terra and Aqua  
2 platforms and geostationary satellite (GEO) images.<sup>6</sup> The product also provides four cloud  
3 types: low-level clouds (surface–700 hPa), lower mid-level clouds (700–500 hPa), higher  
4 mid-level clouds (500–300 hPa), and high-level clouds (300–50 hPa). The exact location  
5 of cloud layers is determined by its effective pressure.

6 The clear- ( $\alpha_{clear}$ ) and cloudy-sky ( $\alpha_{cloudy}$ ) surface albedo (i.e., snow albedo) at 6 bands  
7 (0.2–0.7, 0.7–1.3, 1.3–1.9, 1.9–2.5, 2.5–3.5, and 3.5–4.0  $\mu\text{m}$ ) was simulated by the Snow,  
8 Ice, and Aerosol Radiative (SNICAR) model under clear and cloudy sky conditions,  
9 respectively, with a  $R_{ef}$  of 200 (1000)  $\mu\text{m}$  for fresh (old) snow in the autumn–winter  
10 (spring–summer) season. Meanwhile, we assumed a soil albedo of 0.3 for the bottom layer,  
11 representing the reflection properties beneath the snowpack. The other input parameters  
12 for SNICAR include snow thickness and density and the BC content of the snow ( $BC_S$ ).  
13 Here, snow thickness and density values are derived from MERRA-2 data (product:  
14 `tavgM_2d_lnd_Nx`), and  $BC_S$  values are obtained from the Coupled Model  
15 Intercomparison Project Phase 6 (CMIP6) historical experiment results. Here we collect a  
16 total of 7 model results (i.e., CESM2\_historical, CESM2-FV2\_historical, CESM2-  
17 WACCM\_historical, CESM2-WACCM-FV2\_historical, NorESM2-LM\_historical,  
18 NorESM2-MM\_historical, and TaiESM1\_historical), and then give the results of the multi-  
19 model averages. Eyring et al.<sup>7</sup> has presented a comprehensive description on the CMIP6  
20 experimental design and organization, the CMIP6 results are publicly available at  
21 <https://esgf-node.llnl.gov/search/cmip6/>. For this study, we employed the multi-model  
22 average monthly  $BC_S$  output for the period 2010–2014 to drive the SNICAR model.  
23 Finally, the all-sky snow albedo ( $\alpha_{all-sky}$ ) as inputs for Fu-Liou model was then calculated  
24 based on weighted clear- and cloudy-sky albedo values depending on the cloud fraction  
25 (CF) (i.e.,  $\alpha_{all-sky} = CF \times \alpha_{cloudy} + (1 - CF) \times \alpha_{clear}$ ), and the data of CF were obtained from  
26 the Clouds and the Earth's Radiant Energy System (CERES)  
27 (<https://ceres.larc.nasa.gov/products.php?product=SYN1deg>). In addition, all other  
28 products used in this study are also for the year 2010–2014 and, unless otherwise stated,  
29 have been remapped to  $2.5^\circ \times 1.875^\circ$  resolution to match CMIP6 model results.

30

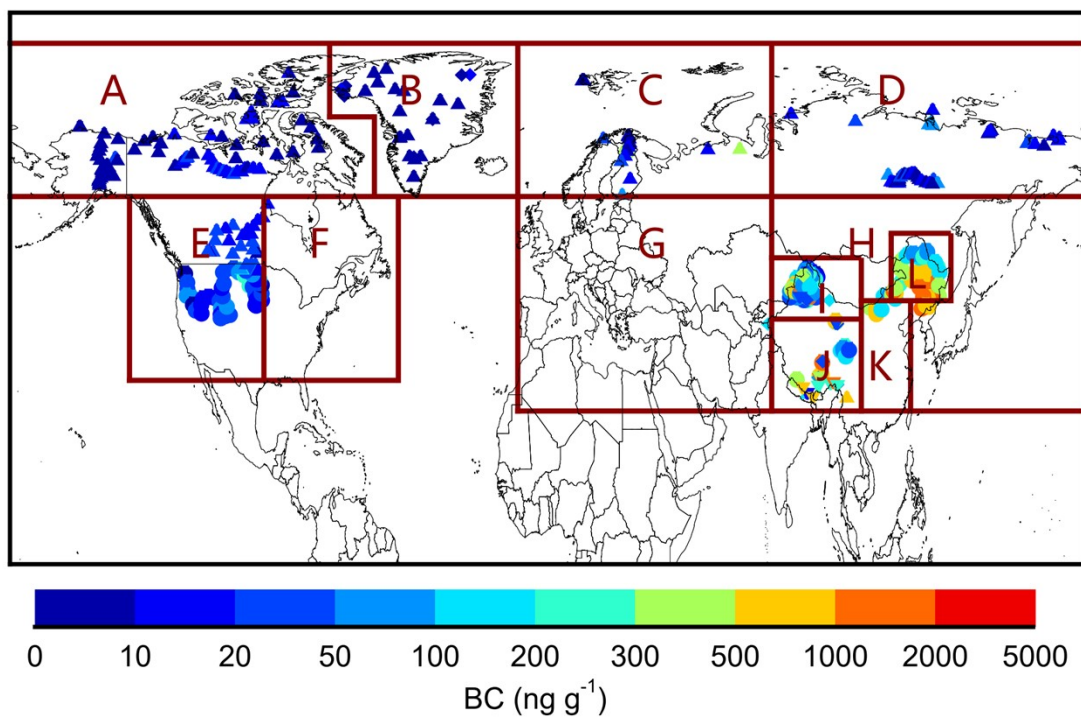

1

2 **Figure S1.** Spatial distribution of the measured black carbon (BC) concentration across the  
 3 Northern Hemisphere. Here the Northern Hemisphere are separated into twelve study regions, and  
 4 regions are labelled in order from A to L.

5

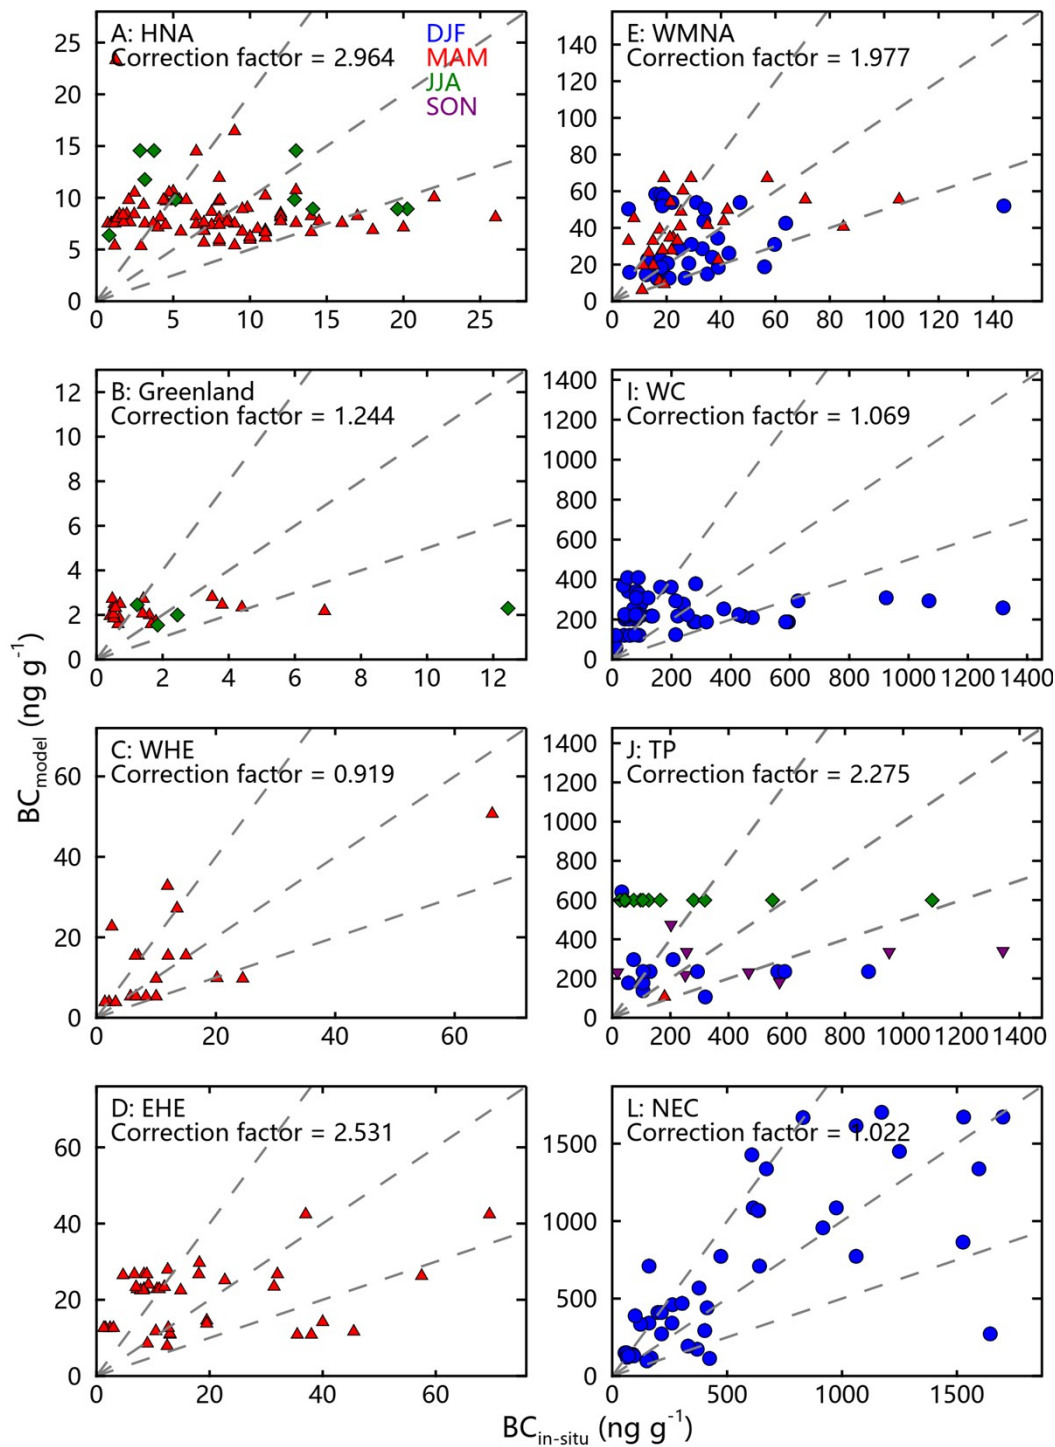

1

2 **Figure S2.** Comparison of the snowpack BC measurements and CMIP6 multi-model averaged BC  
 3 concentrations in the HNA, Greenland, WHE, EHE, WMNA, WC, TP, and NEC.

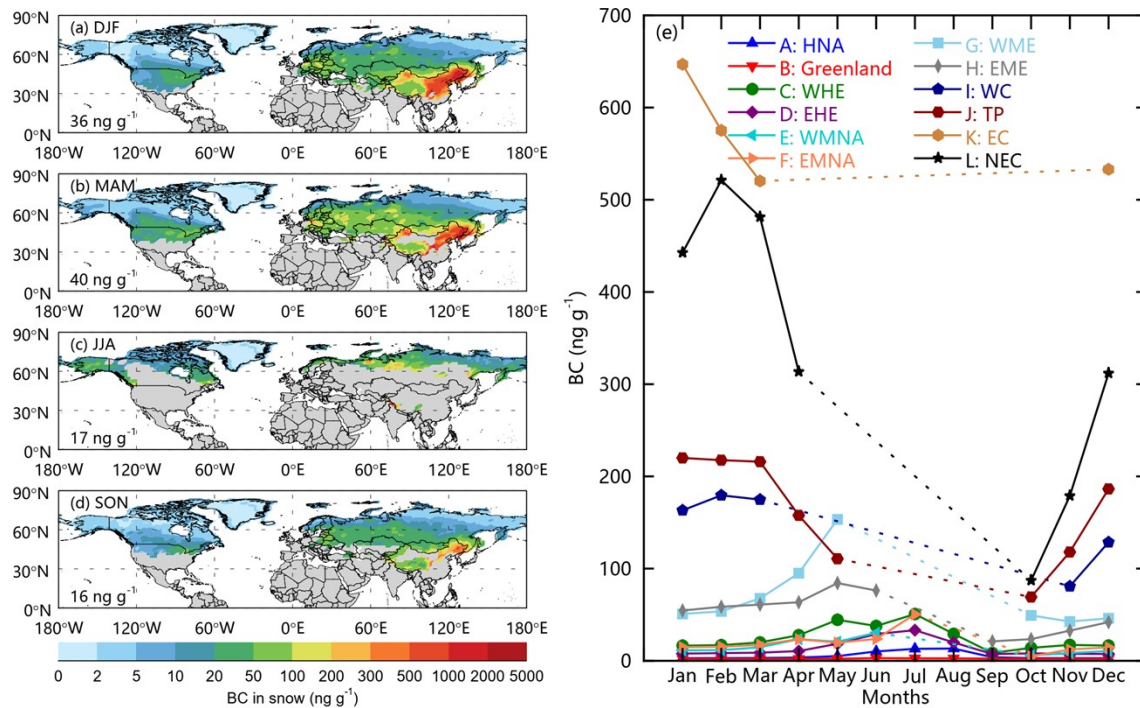

1

2 **Figure S3.** Spatial distributions of mean seasonal snow BC contents in the Northern Hemisphere  
 3 for (a) DJF, (b) MAM, (c) JJA, and (d) SON during 2010–2014. Regional averages for the entire  
 4 hemisphere are shown in the bottom left corner of each panel. (e) Mean monthly BC<sub>s</sub> for each  
 5 region.

6

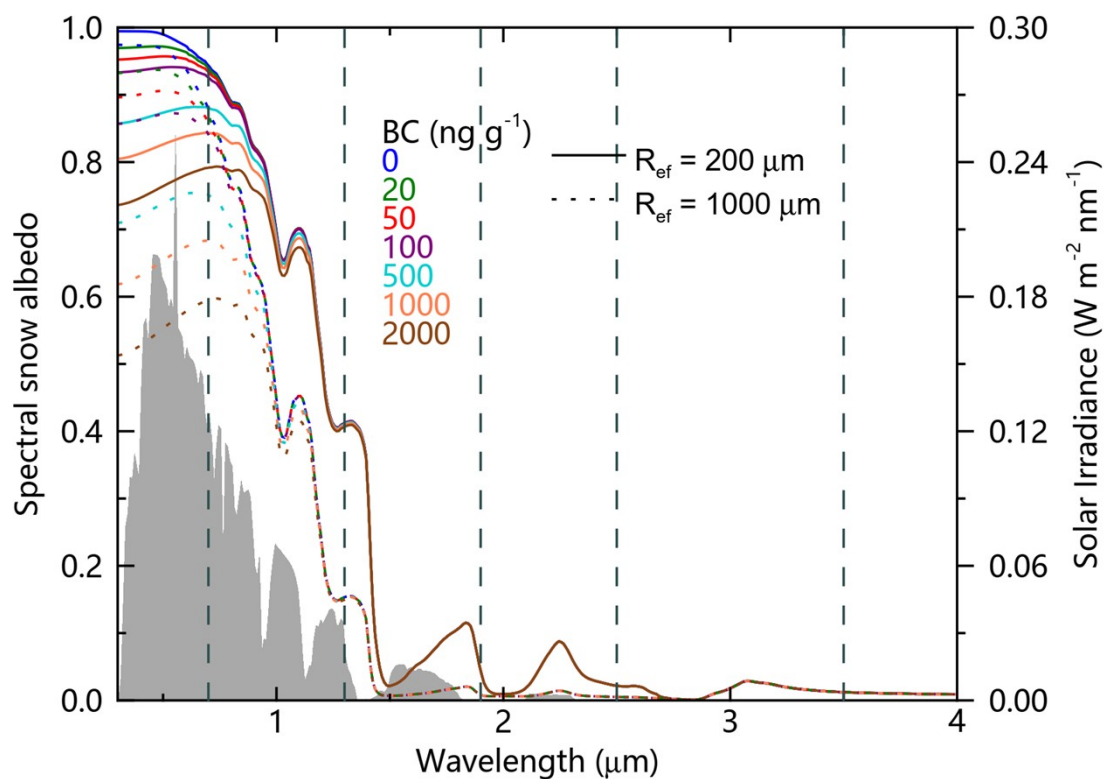

1

2 **Figure S4.** Spectral snow albedo simulated by the SNICAR model with 0, 20, 50, 100, 500, 1000,  
 3 and 2000  $\text{ng g}^{-1}$  of BC contamination for fresh snow (solid line) and old snow (dotted line), under  
 4 cloudy sky conditions. Gray areas denote the typical spectral solar irradiance for mid-latitude  
 5 winter. Fu-Liou bands at the solar spectra (0.2–0.7, 0.7–1.3, 1.3–1.9, 1.9–2.5, 2.5–3.5, and 3.5–4.0  
 6  $\mu\text{m}$ ) are shown separated by gray dashed lines.

7

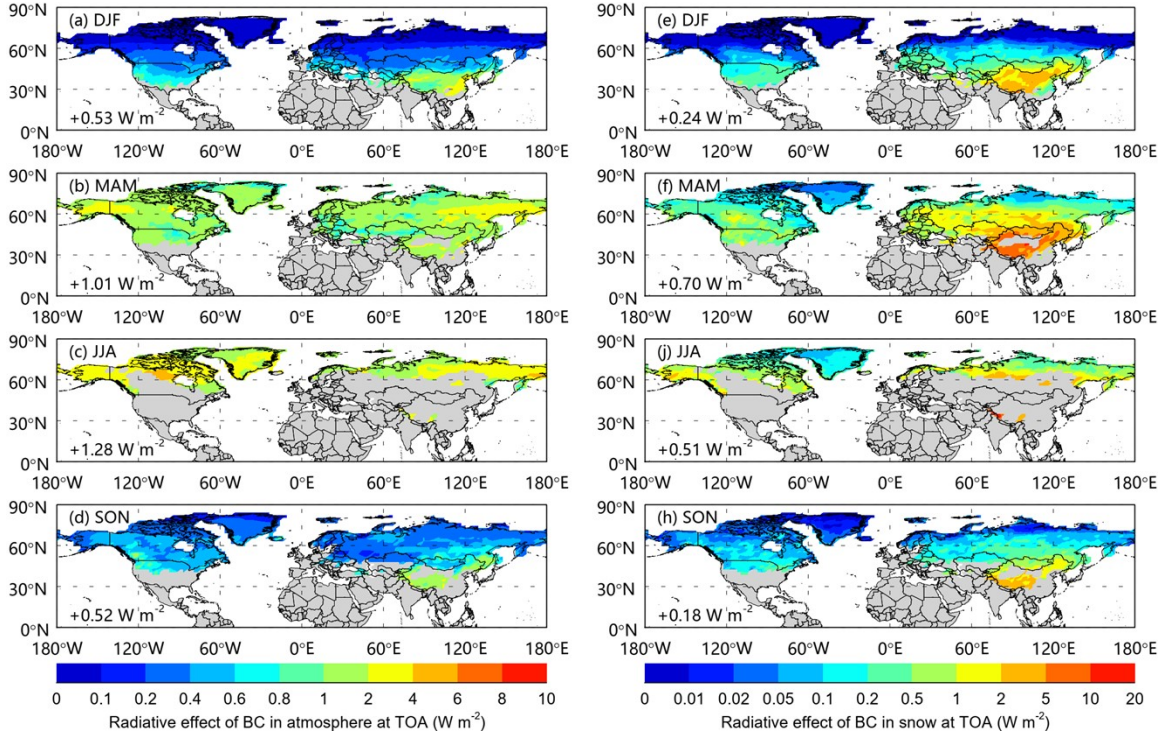

2 **Figure S5.** Spatial distributions of mean seasonal radiative effect of (a–d) atmospheric BC (  
3  $RE_{atmo}^{TOA}$ ) and (e–f) snow BC ( $RE_{snow}^{TOA}$ ) over the Northern Hemisphere in 2017 at the TOA. Regional  
4 averages for the Northern Hemisphere are shown in the bottom left corner of each panel.  
5

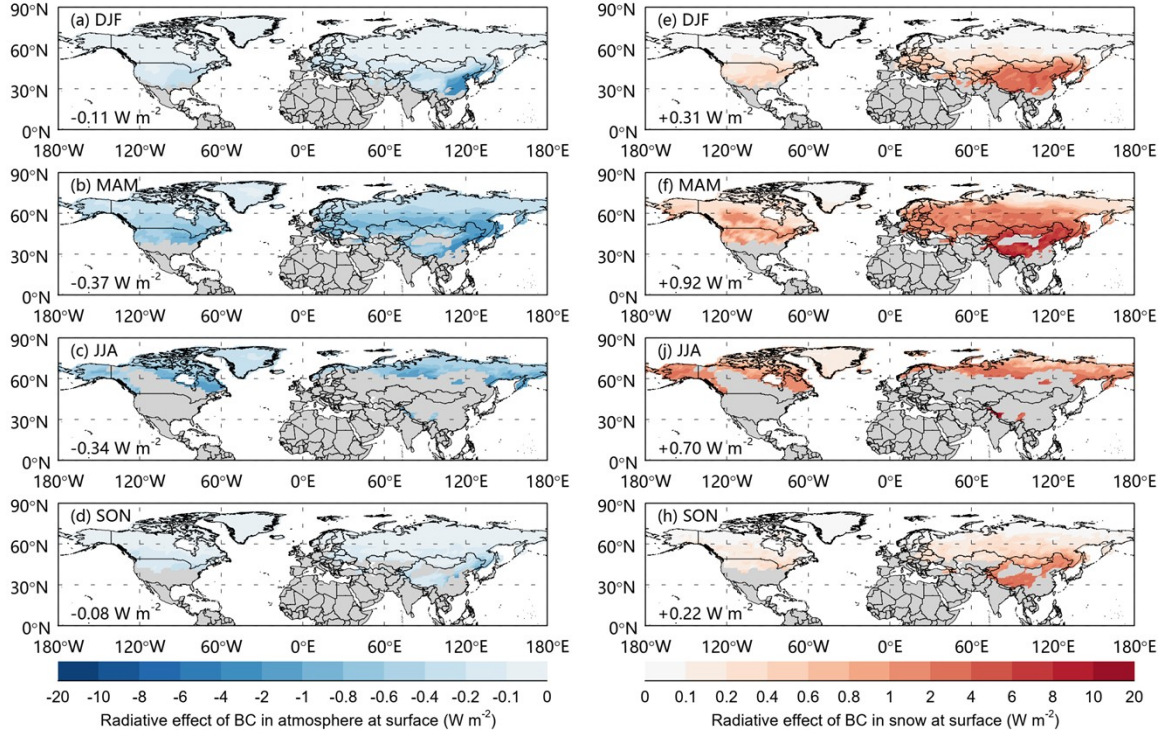

1  
2 **Figure S6.** As for Figure S3, but depicting (a–d) atmospheric BC ( $RE_{atmo}^{Sur}$ ) and (e–f) snow BC ( $RE_{snow}^{Sur}$ ) radiative effect at the surface.  
3  
4

1 **Table S1.** The correction factor of CMIP6 averaged BC concentrations in snow for different  
2 regions.

| Region       | Correction factor |
|--------------|-------------------|
| A: HNA       | 2.964             |
| B: Greenland | 1.244             |
| C: WHE       | 0.919             |
| D: EHE       | 2.531             |
| E: WMNA      | 1.977             |
| F: EMNA      | 1.977             |
| G: WME       | 0.994             |
| H: EME       | 1.069             |
| I: WC        | 1.069             |
| J: TP        | 2.275             |
| K: EC        | 1.022             |
| L: NEC       | 1.022             |

3

#### 4 References

- 5 1. C. A. Randles, A. M. Da Silva, V. Buchard, P. R. Colarco, A. Darmenov, R.  
6 Govindaraju, A. Smirnov, B. Holben, R. Ferrare, J. Hair, Y. Shinozuka and C. J. Flynn,  
7 The MERRA-2 Aerosol Reanalysis, 1980 Onward. Part I: System Description and  
8 Data Assimilation Evaluation, *J Climate*, 2017, **30**, 6823-6850.
- 9 2. V. Buchard, C. A. Randles, A. M. da Silva, A. Darmenov, P. R. Colarco, R.  
10 Govindaraju, R. Ferrare, J. Hair, A. J. Beyersdorf, L. D. Ziemba and H. Yu, The  
11 MERRA-2 Aerosol Reanalysis, 1980 Onward. Part II: Evaluation and Case Studies, *J*  
12 *Climate*, 2017, **30**, 6851-6872.
- 13 3. B. N. Holben, T. F. Eck, I. Slutsker, D. Tanre, J. P. Buis, A. Setzer, E. Vermote, J. A.  
14 Reagan, Y. J. Kaufman, T. Nakajima, F. Lavenue, I. Jankowiak and A. Smirnov,  
15 AERONET - A federated instrument network and data archive for aerosol  
16 characterization, *Remote Sens Environ*, 1998, **66**, 1-16.
- 17 4. C. A. Gueymard and D. Z. Yang, Worldwide validation of CAMS and MERRA-2  
18 reanalysis aerosol optical depth products using 15 years of AERONET observations,  
19 *Atmospheric Environment*, 2020, **225**.
- 20 5. P. Minnis, G. Hong, S. Sun-Mack, W. L. Smith, Y. Chen and S. D. Miller, Estimating  
21 nocturnal opaque ice cloud optical depth from MODIS multispectral infrared radiances  
22 using a neural network method, *J Geophys Res-Atmos*, 2016, **121**, 4907-4932.
- 23 6. P. Minnis, S. Sun-Mack, D. F. Young, P. W. Heck, D. P. Garber, Y. Chen, D. A.  
24 Spangenberg, R. F. Arduini, Q. Z. Trepte, W. L. Smith, J. K. Ayers, S. C. Gibson, W.  
25 F. Miller, G. Hong, V. Chakrapani, Y. Takano, K. N. Liou, Y. Xie and P. Yang,  
26 CERES Edition-2 Cloud Property Retrievals Using TRMM VIRS and Terra and Aqua  
27 MODIS Data—Part I: Algorithms, *Ieee T Geosci Remote*, 2011, **49**, 4374-4400.
- 28 7. V. Eyring, S. Bony, G. A. Meehl, C. A. Senior, B. Stevens, R. J. Stouffer and K. E.  
29 Taylor, Overview of the Coupled Model Intercomparison Project Phase 6 (CMIP6)  
30 experimental design and organization, *Geosci Model Dev*, 2016, **9**, 1937-1958.
